# Supplementary material for: Amorphous NiCoB-coupled MAPbI3 for efficient photocatalytic hydrogen evolution
Source: Royal Society of Chemistry journal article supplement (doi:10.1039/d1dt03633e), 2021-01-01
Supplement: d1dt03633e1.pdf [file d1dt03633e1.pdf]

## Supplementary Information

### **Amorphous NiCoB-coupled MAPbI<sub>3</sub> for efficient photocatalytic hydrogen evolution**

*Lanxuan Jiang,<sup>[a]</sup> Yanmei Guo,<sup>[a]</sup> Shaopeng Qi,<sup>[a]</sup> Ke Zhang,<sup>[a]</sup> Jinxi Chen,<sup>[a]</sup> and  
Yongbing Lou\*<sup>[a]</sup> and Yixin Zhao<sup>[b]</sup>*

[a] School of Chemistry and Chemical Engineering, Southeast University, Nanjing, 211189, China. E-mail: lou@seu.edu.cn.

[b] School of Environmental Science and Engineering, Shanghai Jiao Tong University, Shanghai, 200240, P.R. China.

## 1. Experimental Section

### 1.1 Chemicals and Materials

Methylamine solution (MA, 30 wt% in absolute ethanol, Aladdin),  $\text{PbI}_2$  (98%, Macklin), HI (55-57 wt% in water, Aladdin),  $\text{H}_3\text{PO}_2$  (50 wt% in water, Aladdin),  $\text{H}_2\text{PtCl}_6$  (99%, Jiuding Chemical), tetrabutylammonium fluorophosphate ( $\text{TBAPF}_6$ , 98%, Shanghai Xushuo), diethyl ether ( $\text{C}_4\text{H}_{10}\text{O}$ ,  $\geq 99.7\%$ , Sinopharm Chemical Reagent Co., Ltd, China), methylene chloride ( $\text{CH}_2\text{Cl}_2$ ,  $\geq 99.5\%$ , Sinopharm Chemical Reagent Co., Ltd, China). All reagents were used without any purifications.

### 1.2 Synthesis of MAI

MAI was prepared by mixing MA and HI solution. Add 33 mL MA solution and 19 mL HI solution into a 100 mL flask, and keep the mixture stirring for 2 h at 0 °C. The solution was evaporated at 50 °C to obtain the MAI crude product. The obtained white powder was washed several times with diethyl ether and placed in a vacuum oven (60 °C) overnight.

### 1.3 Preparation of Pt/MAPbI<sub>3</sub>

Pt/MAPbI<sub>3</sub> composite was achieved via a photoreduction method. Specifically, 50 mg MAPbI<sub>3</sub> and 4 mg  $\text{H}_2\text{PtCl}_6$  were added to the prepared MAPbI<sub>3</sub>-saturated solution and then exposed to visible light irradiation ( $\lambda \geq 420\text{nm}$ ) for 2 h.

### 1.4 Characterization

Powder X-ray diffraction (XRD) of the samples was tested using an Ultima-IV Powder X-ray Diffraction (Rigaku, Japan) equipped with a Cu K $\alpha$  incident source. The UV-vis diffuse reflectance spectra were measured using an ultraviolet-visible

(UV–vis) spectrophotometer (UV2600) (Shimadzu, Japan) and BaSO<sub>4</sub> was used as a reflectance standard. The morphology of the products was characterized by scanning electron microscopy (SEM, FEI Inspect F50). Transmission electron microscopy (TEM) images were taken by a Tecnai G2 20 transmission electron microscope (FEI, USA) at an acceleration voltage of 200 kV. X-ray photoelectron spectroscopy (XPS) measurements were performed with a Thermo Fisher Nexsa spectrometer with a Al K $\alpha$  X-ray radiation. The binding energies were calibrated using C1s peak (284.8 eV). The photoluminescence (PL) spectra were obtained by a Fluoromax-4 spectrofluorometer spectrometer (Horiba, Japan) with an excitation wavelength of 500 nm. Zeta potentials were measured with a NanoBrook Omni zeta potential analyzer (Brookhaven, USA).

### 1.5 Electrochemical and photoelectrochemical measurements

All the electrochemical and photoelectrochemical tests were performed at the CHI-660D Electrochemical Workstation (Shanghai Chenhua). In a standard three-electrode system, a Pt sheet was used as the counter electrode and the saturated Ag/AgCl as the reference electrode. The electrolyte chosen was a dichloromethane solution of 0.1M tetrabutylammonium fluorophosphate (TBAPF<sub>6</sub>). As for the fabrication of working electrode, the photocatalyst powder was ground with a drop of terpinol and smeared onto plasma-treated FTO conductive glass, then left to air dry naturally. Electrochemical impedance spectroscopy (EIS) was obtained with the test frequency range of 0.1 to 10<sup>5</sup> Hz. Current-voltage (I-V) curves were measured using linear sweep voltammetry (LSV) method with the scan rate of 10 mV s<sup>-1</sup>. Photocurrent

response curves were obtained by irradiating the working electrode at regular intervals, using a 300 W Xe-lamp with a 420 nm cut-off filter as the light source.

#### 1.6 The calculation of Apparent Quantum efficiency (AQE):

The light intensity of irradiation at 450 nm was measured by an optical power meter (PL-MW2000, Perfectlight, Beijing). The measured light intensity (P) was 1.86 mW cm<sup>-2</sup>. The irradiation area (S) was 28.26 cm<sup>2</sup> and the evolution amount of H<sub>2</sub> (n) in 4 h was 27.8 μmol:

$$\begin{aligned} \text{AQE} &= \frac{2 \times \text{the number of evolved H}_2 \text{ molecules}}{\text{the number of incident photons}} \times 100\% \\ &= \frac{2nNA}{PS\lambda/hc} \times 100\% = 1.96\% \end{aligned}$$

## 2. Additional Data

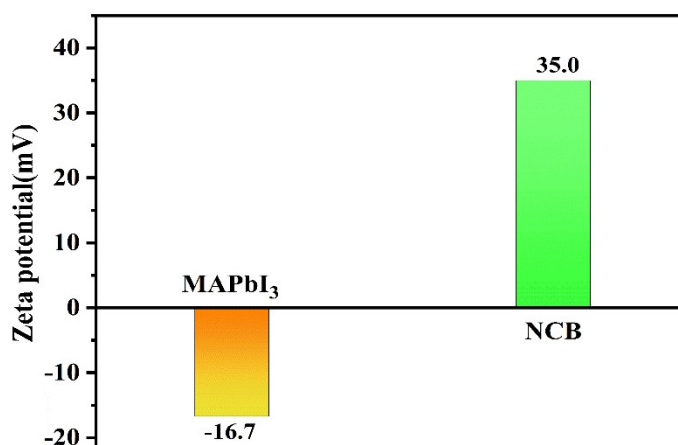

**Fig. S1 Zeta potentials of MAPbI<sub>3</sub> and NiCoB**

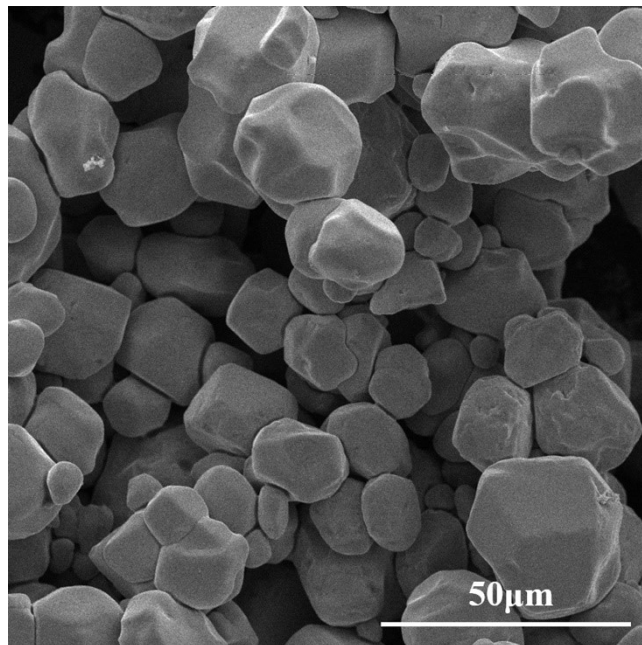

**Fig. S2 SEM image of MAPbI<sub>3</sub>**

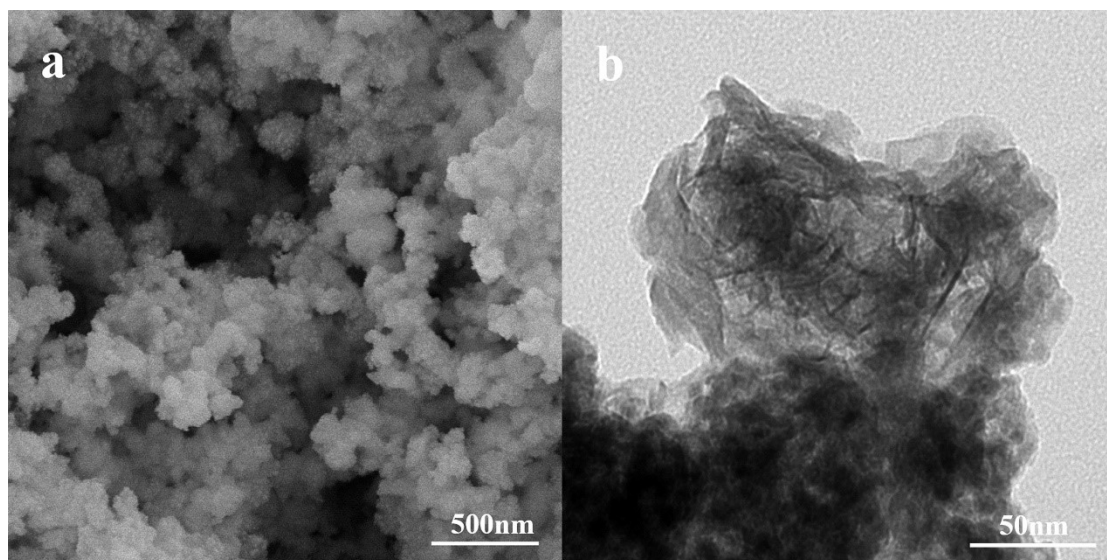

**Fig. S3 (a) SEM and (b) TEM images of NiCoB**

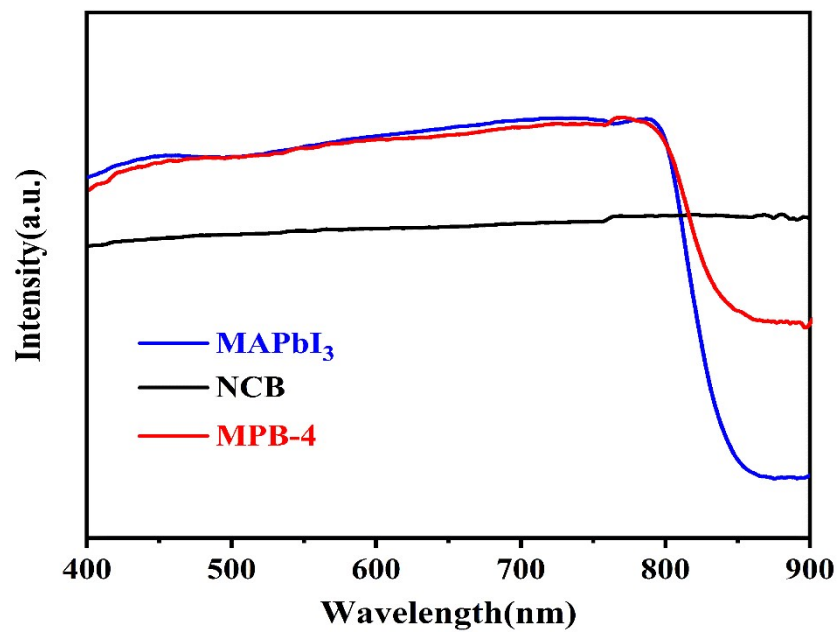

Fig. S4 UV-vis absorption spectra of NiCoB, MAPbI<sub>3</sub> and MPB-4.

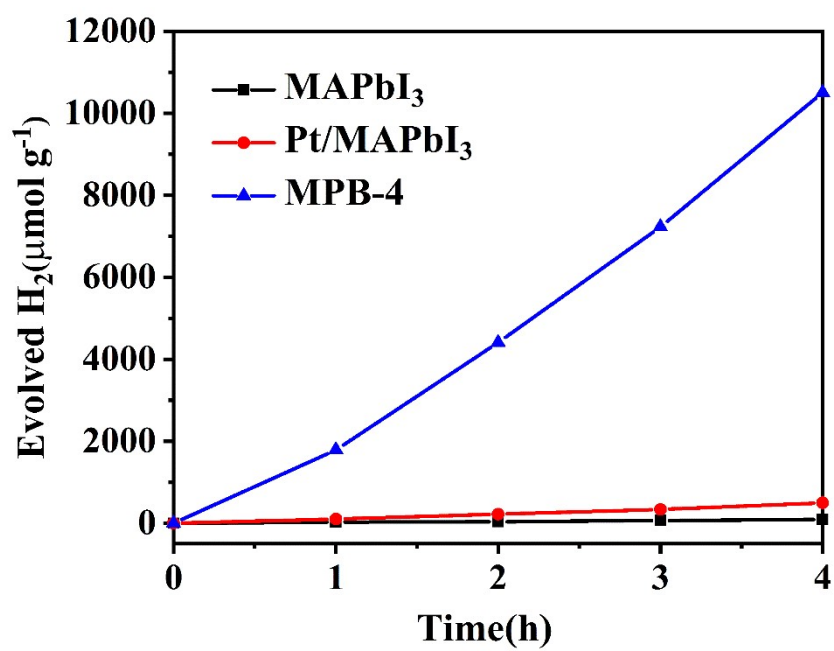

Fig. S5 Time-dependent photocatalytic H<sub>2</sub> production of MAPbI<sub>3</sub>, Pt/MAPbI<sub>3</sub>, and MPB-4.

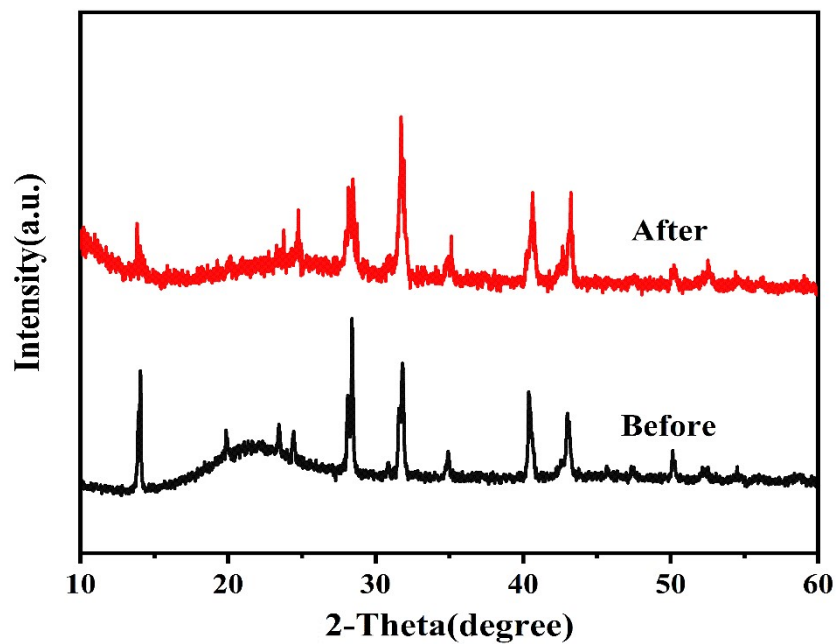

Fig. S6 XRD patterns of the MPB-4 before and after being illuminated for 24 h of photocatalytic  $\text{H}_2$  evolution.

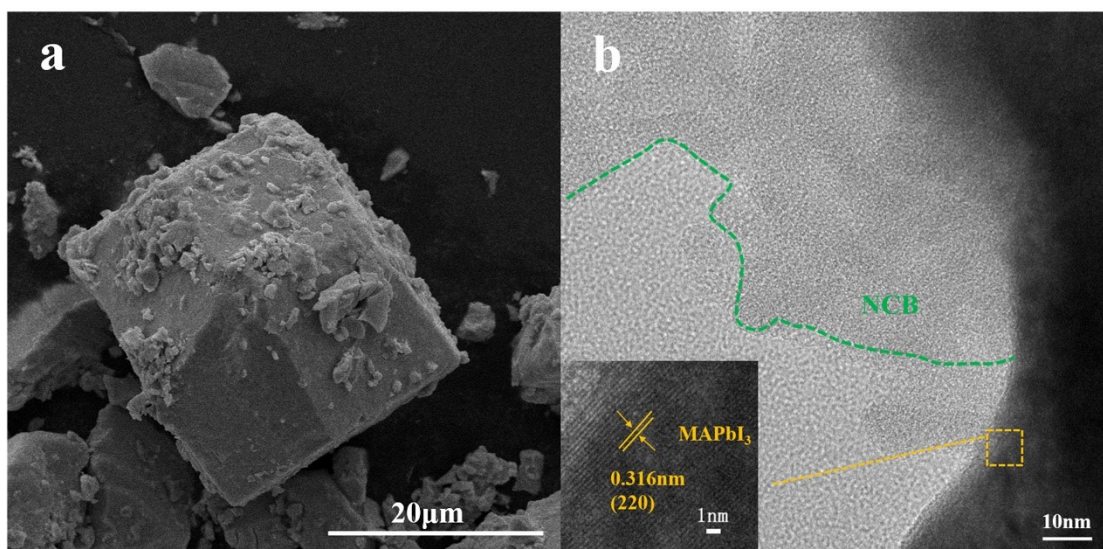

Fig. S7 SEM and HRTEM images of the MPB-4 after being illuminated for 24 h of photocatalytic  $\text{H}_2$  evolution.



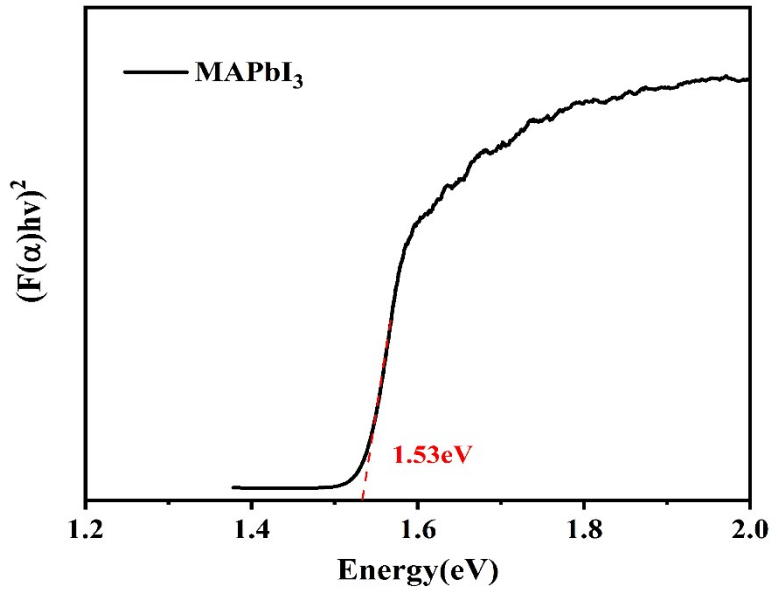

Fig. S8 The Kubelka-Munk plot of MAPbI<sub>3</sub>.

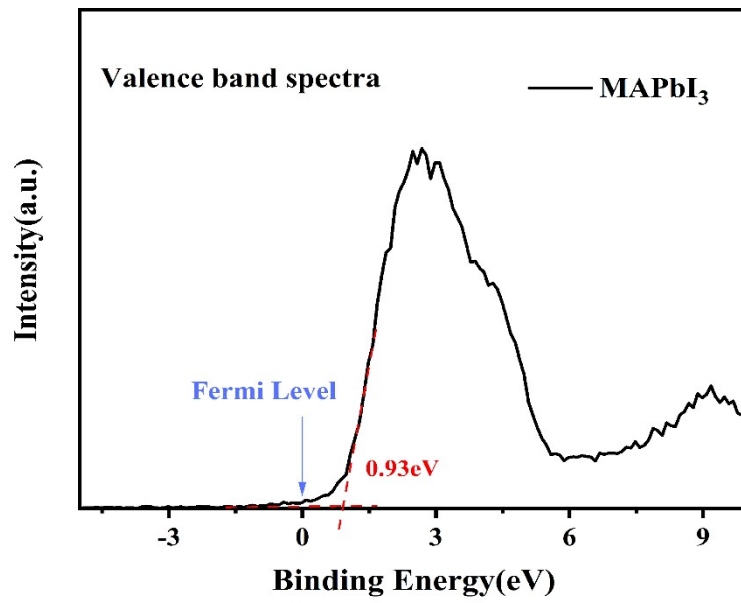

Fig. S9 Valence band XPS spectrum of MAPbI<sub>3</sub> powder.

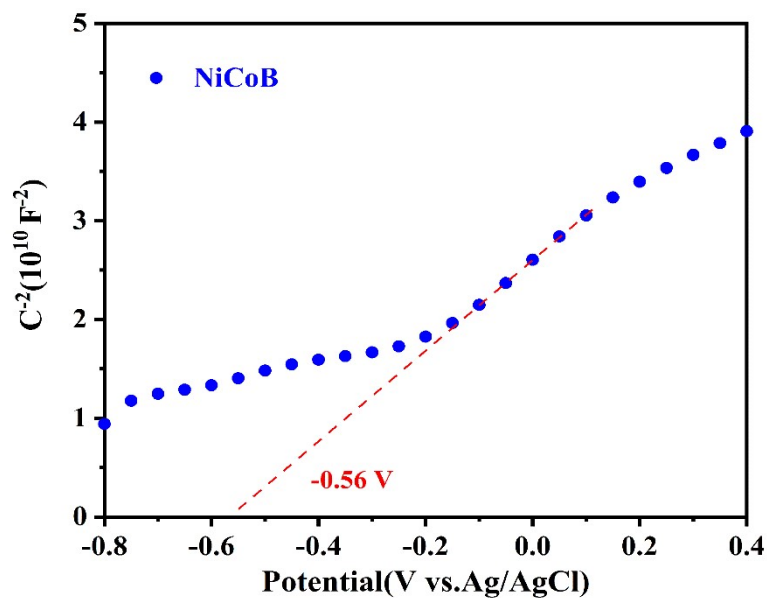

Fig. S10 Mott-Schottky curve of the NiCoB

Table S1. The comparison of photocatalytic HER performance over the NiCoB/MAPbI<sub>3</sub> and other reported MAPbI<sub>3</sub>-based photocatalysts.

| Catalysts                                | Reactant solution                          | Light source                                                               | H <sub>2</sub> evolution ( $\mu\text{mol g}^{-1} \text{ h}^{-1}$ ) | Ref.      |
|------------------------------------------|--------------------------------------------|----------------------------------------------------------------------------|--------------------------------------------------------------------|-----------|
| NiCoB/MAPbI <sub>3</sub>                 | HI/H <sub>3</sub> PO <sub>2</sub> solution | 300 W Xe lamp (100 mW $\text{cm}^{-2}$ , $\lambda \geq 420 \text{ nm}$ )   | 2625.57                                                            | This work |
| Pt/MAPbI <sub>3</sub>                    | HI/H <sub>3</sub> PO <sub>2</sub> solution | 300 W Xe lamp (100 mW $\text{cm}^{-2}$ , $\lambda \geq 420 \text{ nm}$ )   | 124.22                                                             | This work |
| MAPbI <sub>3</sub> /RGO                  | HI/H <sub>3</sub> PO <sub>2</sub> solution | 300 W Xe lamp (120 mW $\text{cm}^{-2}$ , $\lambda \geq 420 \text{ nm}$ )   | 939.00                                                             | 1         |
| MAPbI <sub>3</sub> /Pt                   | HI/H <sub>3</sub> PO <sub>2</sub> solution | Solar simulator (100 mW $\text{cm}^{-2}$ , $\lambda \geq 475 \text{ nm}$ ) | 57.00                                                              | 2         |
| CsPbBr <sub>3-x</sub> I <sub>x</sub> /Pt | HBr/HI/H <sub>3</sub> PO <sub>2</sub>      | 300 W Xe lamp (                                                            | 1120.00                                                            | 3         |

|                                                                           |                                                   |                                                                                      |         |    |
|---------------------------------------------------------------------------|---------------------------------------------------|--------------------------------------------------------------------------------------|---------|----|
|                                                                           | solution                                          | $\lambda \geq 420$ nm)                                                               |         |    |
| Pt/Ta <sub>2</sub> O <sub>5</sub> -<br>MAPbBr <sub>3</sub> -<br>PEDOT:PSS | HBr/H <sub>3</sub> PO <sub>2</sub><br>solution    | 300 W Xe lamp<br>(150 mW<br>cm <sup>-2</sup> , $\lambda \geq 420$ nm)                | 619.00  | 4  |
| MAPbBr <sub>3-x</sub> I <sub>x</sub> /Pt                                  | HBr/HI/H <sub>3</sub> PO <sub>2</sub><br>solution | 300 W Xe lamp (<br>$\lambda \geq 420$ nm)                                            | 2604.80 | 5  |
| MAPbI <sub>3</sub> /Pt/TiO <sub>2</sub>                                   | HI/H <sub>3</sub> PO <sub>2</sub><br>solution     | 300 W Xe lamp<br>(200 mW<br>cm <sup>-2</sup> , $\lambda \geq 420$ nm)                | 1987.00 | 6  |
| MAPb(I <sub>0.9</sub> Br <sub>0.1</sub> ) <sub>3</sub>                    | HBr/HI/H <sub>3</sub> PO <sub>2</sub><br>solution | 300 W Xe lamp (<br>$\lambda \geq 420$ nm)                                            | 1471.00 | 7  |
| MAPb(I <sub>0.9</sub> Br <sub>0.1</sub> ) <sub>3</sub> /Pt                | HBr/HI/H <sub>3</sub> PO <sub>2</sub><br>solution | 300 W Xe lamp (<br>$\lambda \geq 420$ nm)                                            | 3348.00 | 7  |
| MAPbI <sub>3</sub> /CoP                                                   | HI/H <sub>3</sub> PO <sub>2</sub><br>solution     | 150 W Xe lamp (<br>$\lambda \geq 420$ nm)                                            | 2087.50 | 8  |
| MAPbI <sub>3</sub> /Ni <sub>3</sub> C                                     | HI/H <sub>3</sub> PO <sub>2</sub><br>solution     | 300 W Xe lamp<br>(100 mW<br>cm <sup>-2</sup> , $\lambda \geq 420$ nm)                | 2362.00 | 9  |
| MAPbI <sub>3</sub> /MoS <sub>2</sub>                                      | HI/H <sub>3</sub> PO <sub>2</sub><br>solution     | 90 W LED lamp<br>(450 mW<br>cm <sup>-2</sup> , 780 nm $\geq \lambda \geq$<br>380 nm) | 2061.00 | 10 |
| BP/MAPbI <sub>3</sub>                                                     | HI/H <sub>3</sub> PO <sub>2</sub><br>solution     | 300 W Xe lamp<br>(100 mW<br>cm <sup>-2</sup> , $\lambda \geq 420$ nm)                | 3742.0  | 11 |

## References

1. Y. Wu, P. Wang, X. Zhu, Q. Zhang, Z. Wang, Y. Liu, G. Zou, Y. Dai, M.-H. Whangbo and B. Huang, *Adv. Mater.*, 2018, **30**, 1704342.
2. S. Park, W. J. Chang, C. W. Lee, S. Park, H.-Y. Ahn and K. T. Nam, *Nano Energy*, 2016, **2**, 16185.
3. Z. Guan, Y. Wu, P. Wang, Q. Zhang, Z. Wang, Z. Zheng, Y. Liu, Y. Dai, M.-H. Whangbo and B. Huang, *Appl. Catal., B*, 2019, **245**, 522-527.
4. H. Wang, X. Wang, R. Chen, H. Zhang, X. Wang, J. Wang, J. Zhang, L. Mu, K. Wu, F. Fan, X. Zong and C. Li, *ACS Energy Lett.*, 2019, **4**, 40-47.
5. Y. Wu, P. Wang, Z. Guan, J. Liu, Z. Wang, Z. Zheng, S. Jin, Y. Dai, M.-H. Whangbo and B. Huang, *ACS Catal.*, 2018, **8**, 10349-10357.
6. X. Wang, H. Wang, H. Zhang, W. Yu, X. Wang, Y. Zhao, X. Zong and C. Li, *ACS Energy Lett.*, 2018, **3**, 1159-1164.
7. Z. Zhao, J. Wu, Y.-Z. Zheng, N. Li, X. Li, Z. Ye, S. Lu, X. Tao and C. Chen, *Appl. Catal., B*, 2019, **253**, 41-48.
8. C. Cai, Y. Teng, J.-H. Wu, J.-Y. Li, H.-Y. Chen, J.-H. Chen and D.-B. Kuang, *Adv. Funct. Mater.*, 2020, **30**, 2001478.
9. Z. Zhao, J. Wu, Y.-Z. Zheng, N. Li, X. Li and X. Tao, *ACS Catal.*, 2019, **9**, 8144-8152.
10. F. Wang, X. Liu, Z. Zhang and S. Min, *Chem. Commun.*, 2020, **56**, 3281-3284.
11. R. Li, X. Li, J. Wu, X. Lv, Y.-Z. Zheng, Z. Zhao, X. Ding, X. Tao and J.-F. Chen, *Appl. Catal., B*, 2019, **259**, 118075.
